# Supplementary material
Source: PubMed Central journal article supplement (PMC7205492)
Supplement: AEM.00305-20-s0002.pdf [file AEM.00305-20-s0002.pdf]

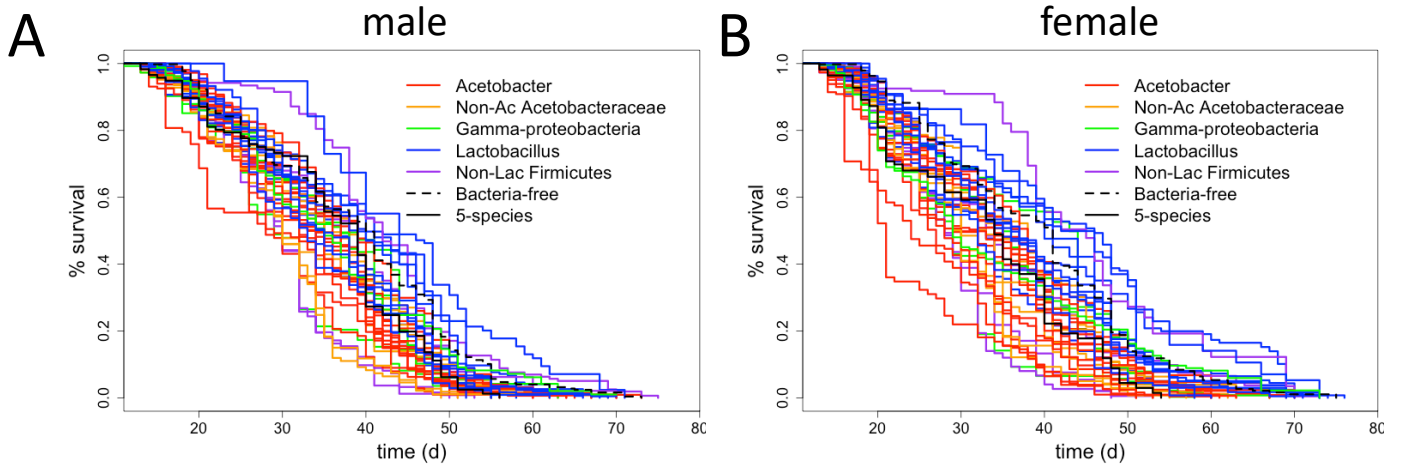

1

2 **Figure S1. Kaplan-Meier plots for Figure 1.** Kaplan—meier plots of lifespan for a) male and (b) female flies that

3 were mono-associated with the different bacteria as summarized in Figure 1.

4

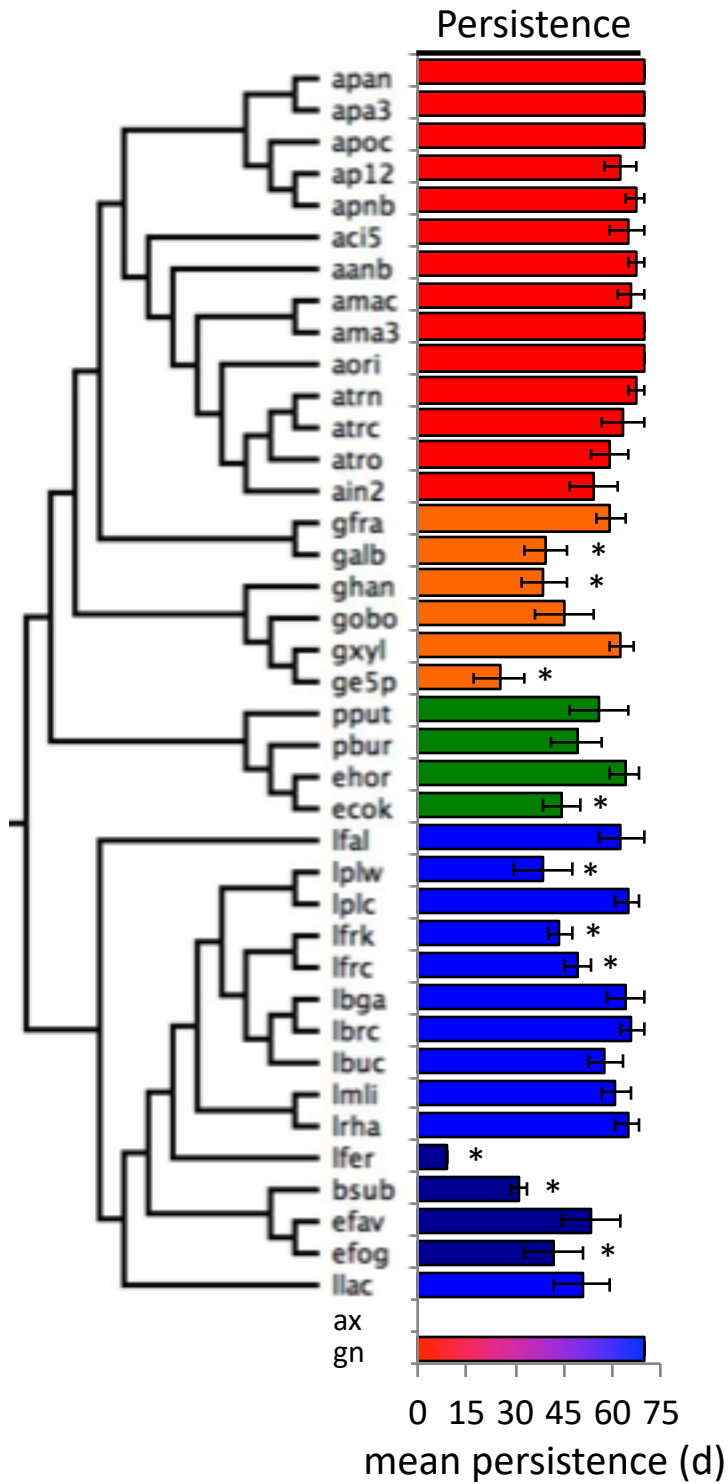

5

6 **Figure S2. Inferred mean persistence of bacteria in flies throughout the lifespan experiment.** Error bars are  
 7 shown as standard error of the mean. Asterisks indicate significantly different persistence than in flies reared  
 8 with a 5-species gnotobiotic community ('gn'). Bacteria-free ('ax'). Other 4-character designations are from  
 9 Table 1.

0

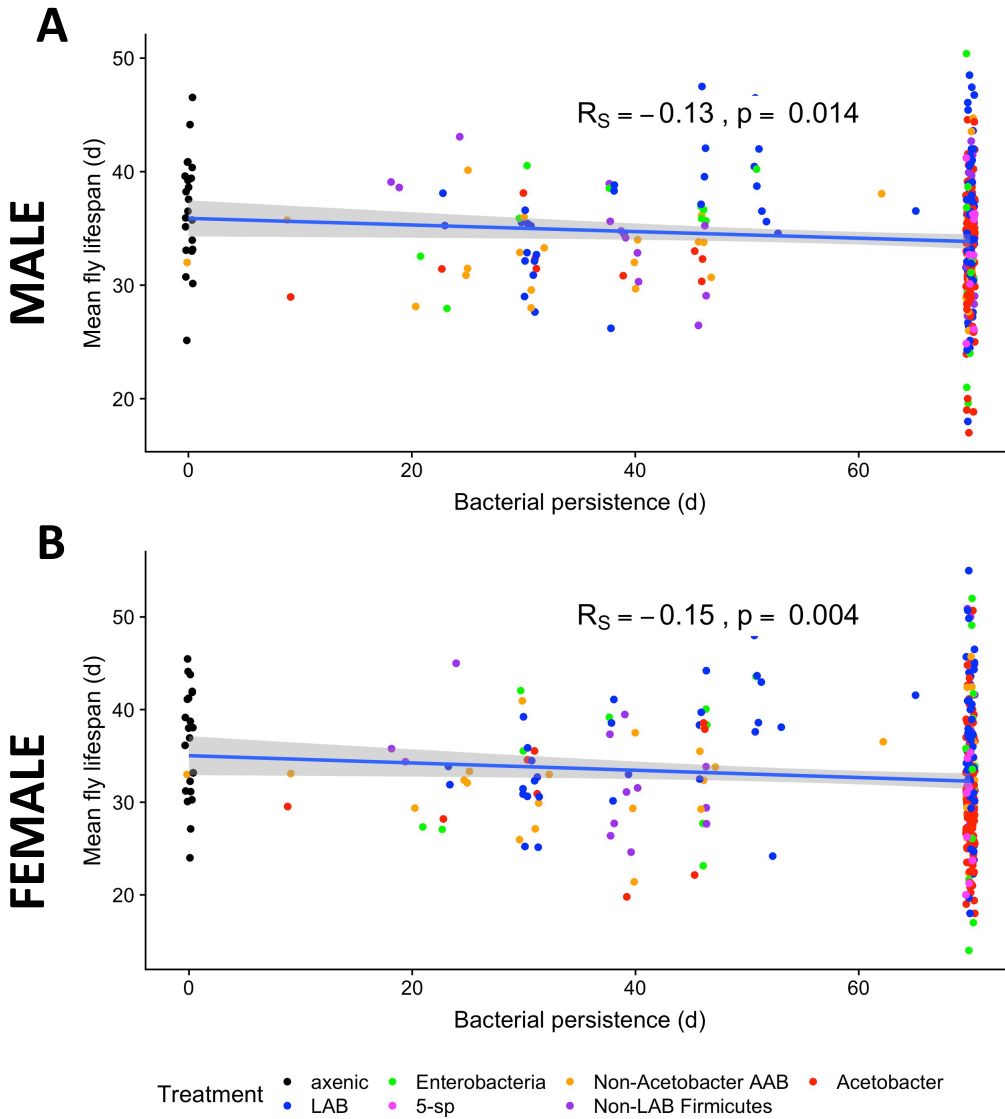

1

2

**Figure S3. Correlations between bacterial persistence and *D. melanogaster* lifespan** are shown in A) male

3

and B) female flies. Individual vials from all replicates of treatments are shown. Bacterial persistence was

4

calculated as the number of days that bacteria could be detected in F1 offspring of the flies being tested for

5

lifespan. Mean lifespan was calculated as the number of days to death of all flies that died.  $R_s$  = Spearman's

6

rho;  $p$  =  $p$ -value.

7

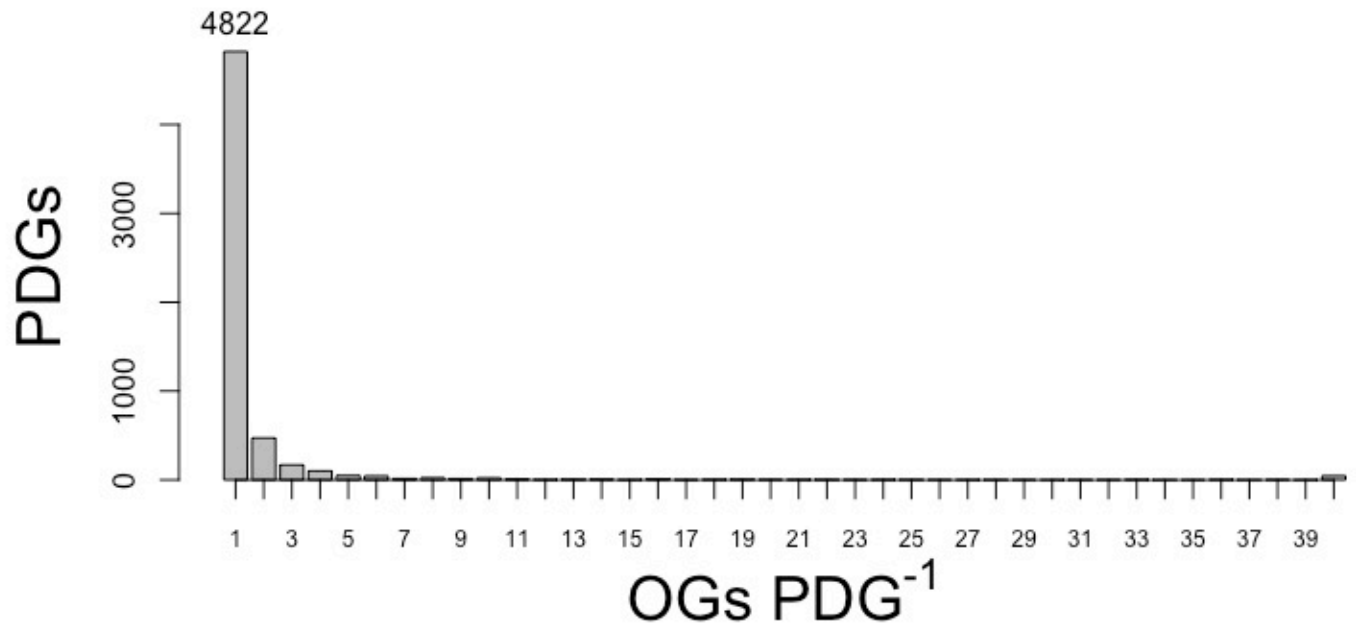

8

9 **Figure S4. Histogram of orthologous groups (OGs) per phylogenetic distribution group (PDG)**

0

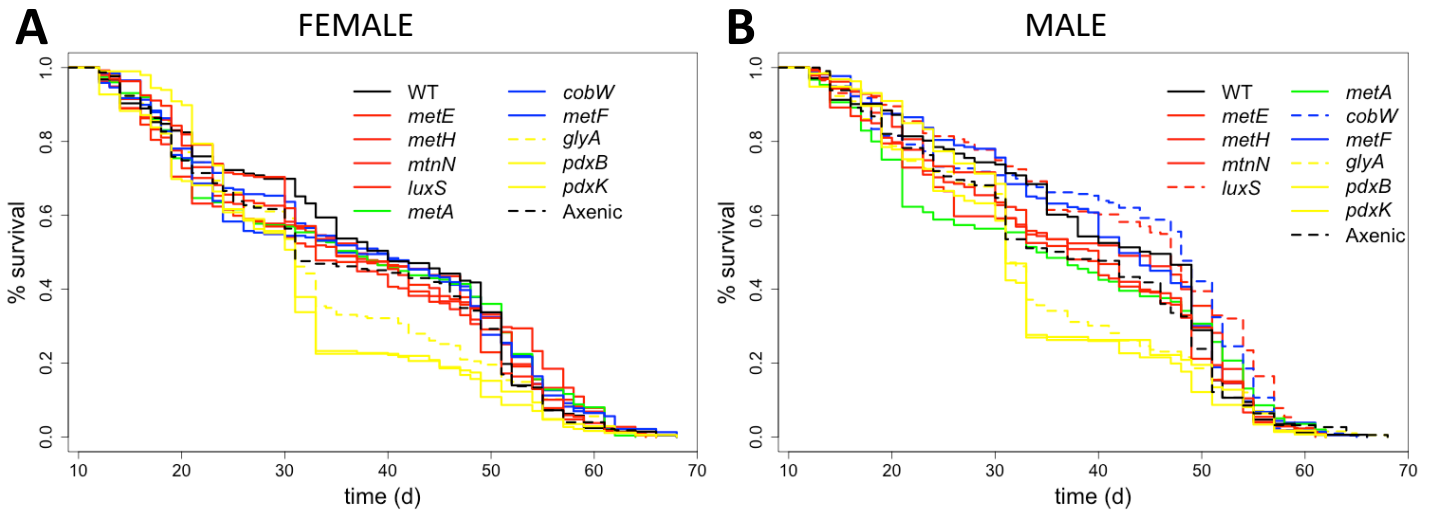

1

2 **Figure S5. Kaplan-Meier plots of the data shown in Figure 2B-C. A) Female; B) Male flies. Coloring follows the**

3 **same patterns as in Figure 2. Treatment names are as in Figure 2 except Axenic = Ax.**
